# Supplementary material for: Exploration of Analgesia with Tramadol in the Coxsackievirus B3 Myocarditis Mouse Model
Source: MDPI journal article supplement (doi:10.3390/v13071222), 2021-06-24
Supplement: s1 [file s1]

Supplemental figure S1

lymphoid cells

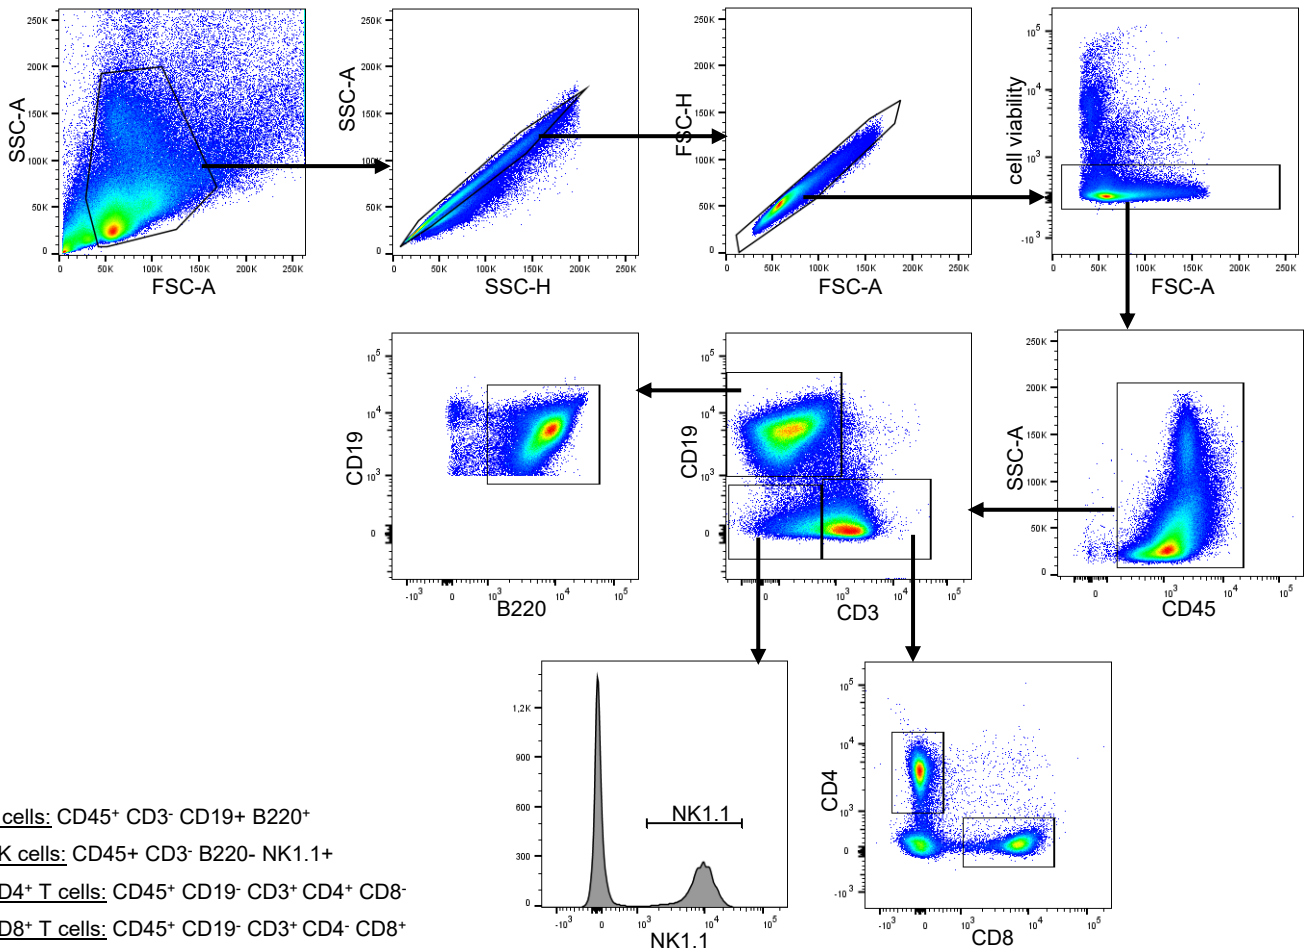

Supplemental figure S2

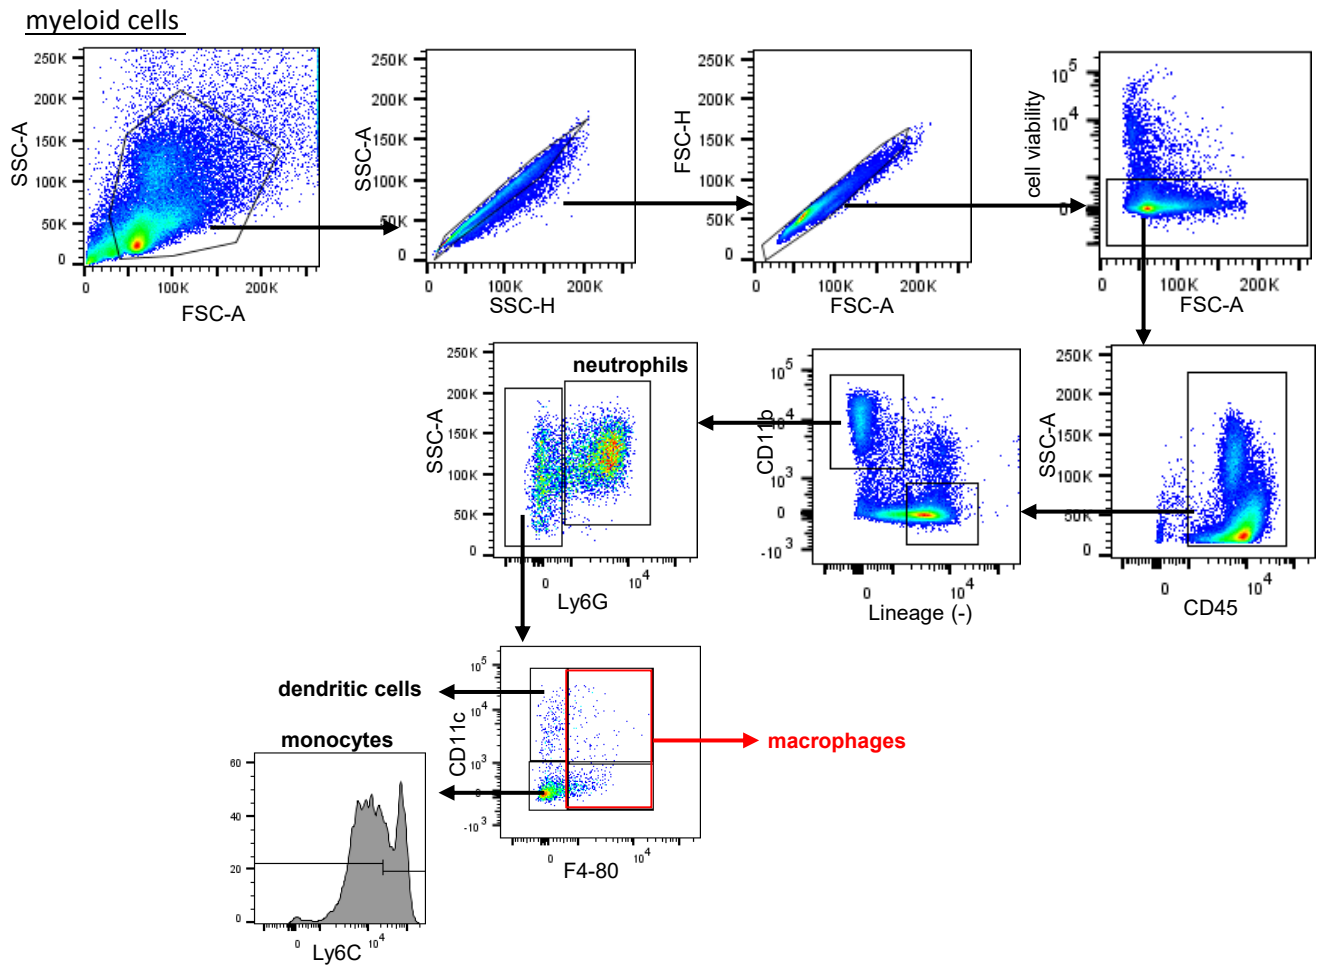

neutrophils: CD45<sup>+</sup> Lineage<sup>-</sup> (CD3<sup>-</sup> B220<sup>-</sup> Ter119<sup>-</sup> CD49b<sup>-</sup>) Ly6G<sup>+</sup>

dendritic cells (DCs): CD45<sup>+</sup> Lineage<sup>-</sup> (CD3<sup>-</sup> B220<sup>-</sup> Ter119<sup>-</sup> CD49b<sup>-</sup>) Ly6G<sup>-</sup> CD11c<sup>+</sup> F4-80<sup>-</sup>

macrophages: CD45<sup>+</sup> Lineage<sup>-</sup> (CD3<sup>-</sup> B220<sup>-</sup> Ter119<sup>-</sup> CD49b<sup>-</sup>) Ly6G<sup>-</sup> CD11c<sup>+</sup> F4-80<sup>+</sup>

Ly6C<sup>+</sup> monocytes: CD45<sup>+</sup> Lineage<sup>-</sup> (CD3<sup>-</sup> B220<sup>-</sup> Ter119<sup>-</sup> CD49b<sup>-</sup>) Ly6G<sup>-</sup> CD11c<sup>-</sup> F4-80<sup>-</sup> Ly6C<sup>+</sup>

Supplemental figure S3

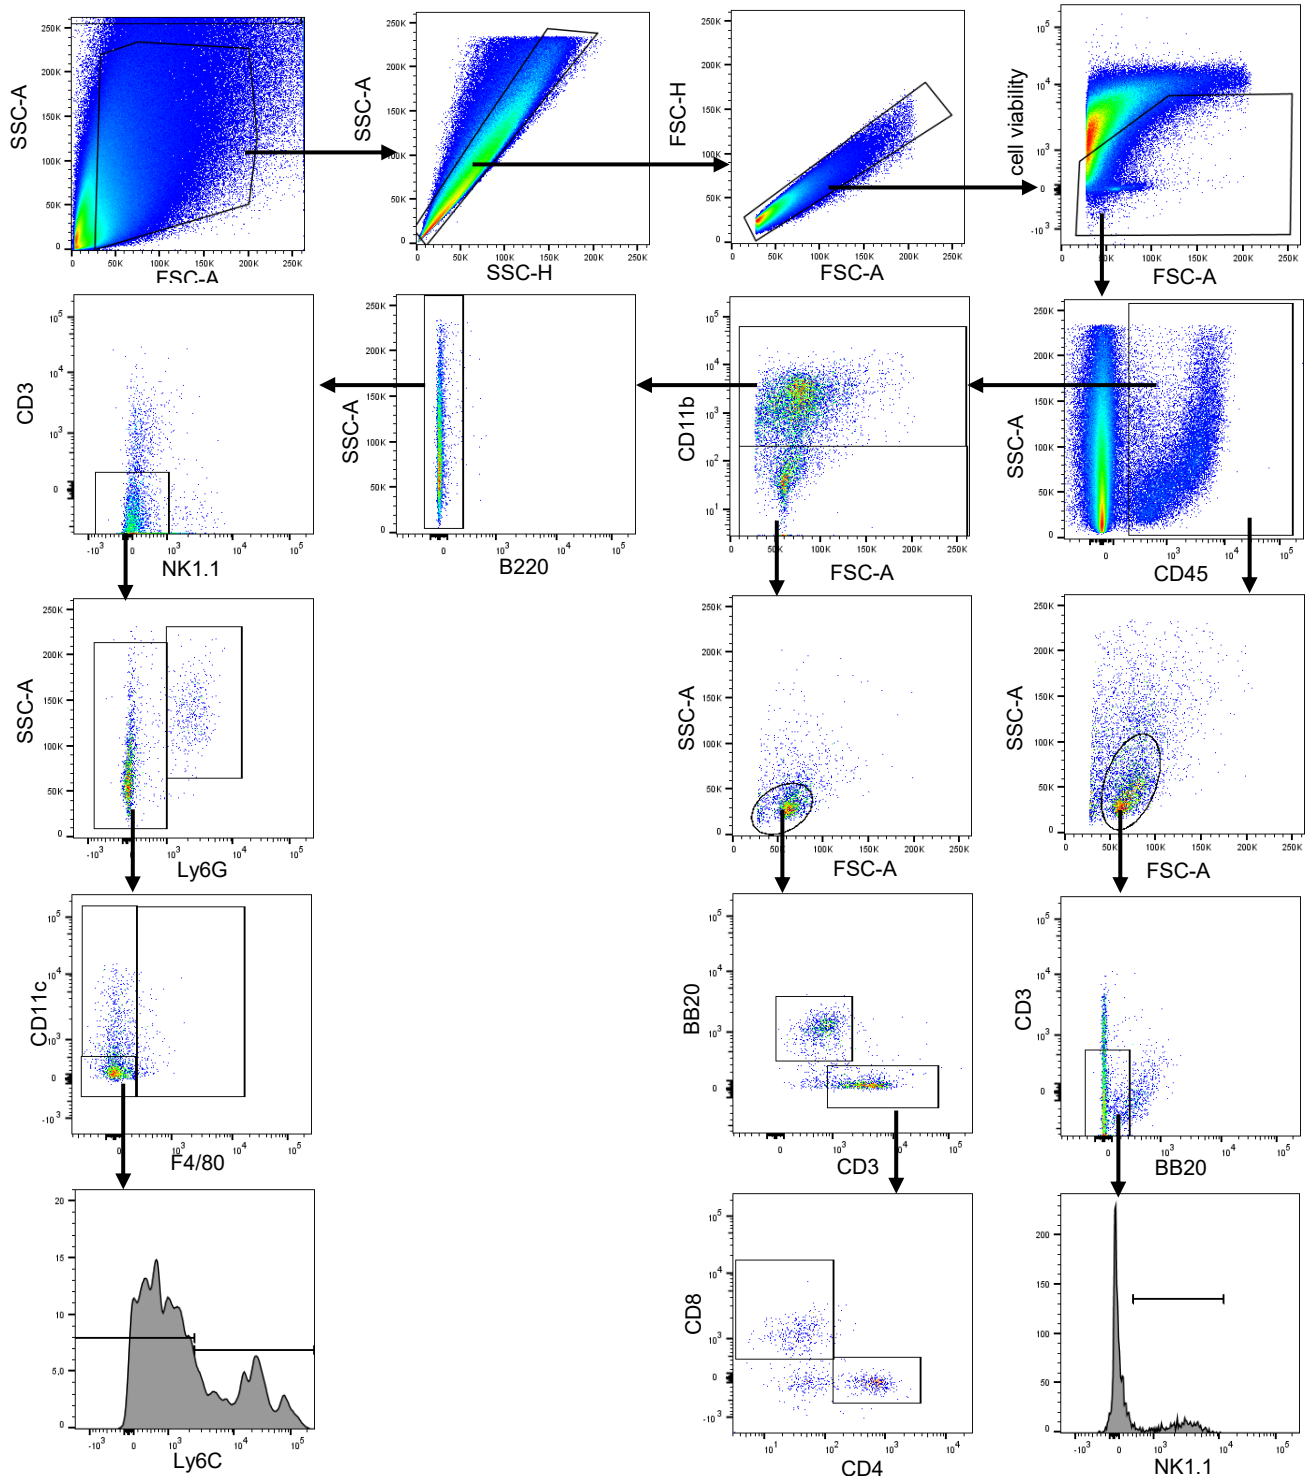

Macrophages: CD45<sup>+</sup> CD11b<sup>+</sup> B220<sup>-</sup> CD3<sup>-</sup> NK1.1<sup>-</sup> Ly6G<sup>-</sup> CD11c<sup>+</sup> F4/80<sup>+</sup>

Dendritic cells: CD45<sup>+</sup> CD11b<sup>+</sup> B220<sup>-</sup> CD3<sup>-</sup> NK1.1<sup>-</sup> Ly6G<sup>-</sup> CD11c<sup>+</sup> F4/80<sup>-</sup>

Ly6<sup>hi</sup> monocytes: CD45<sup>+</sup> CD11b<sup>+</sup> B220<sup>-</sup> CD3<sup>-</sup> NK1.1<sup>-</sup> Ly6G<sup>-</sup> CD11c<sup>-</sup> F4/80<sup>-</sup> Ly6C<sup>hi</sup>

Ly6<sup>low</sup> monocytes: CD45<sup>+</sup> CD11b<sup>+</sup> B220<sup>-</sup> CD3<sup>-</sup> NK1.1<sup>-</sup> Ly6G<sup>-</sup> CD11c<sup>-</sup> F4/80<sup>-</sup> Ly6C<sup>low</sup>

B cells: CD45<sup>+</sup> CD11b<sup>-</sup> B220<sup>+</sup> CD3<sup>-</sup> / NK cells: CD45<sup>+</sup> CD3<sup>+</sup> B220<sup>-</sup> NK1.1<sup>+</sup>

CD4<sup>+</sup> T cells: CD45<sup>+</sup> CD11b<sup>-</sup> B220<sup>-</sup> CD3<sup>+</sup> CD4<sup>+</sup> CD8<sup>-</sup> / CD8<sup>+</sup> T cells: CD45<sup>+</sup> CD11b<sup>-</sup> B220<sup>-</sup> CD3<sup>+</sup> CD4<sup>-</sup> CD8<sup>+</sup>
